# Supplementary material for: Impact of Maternal COVID-19 Infection on Long-Term Neonatal Outcomes in Gestational Diabetes Mellitus Pregnancies: A Cohort Study Around the Lifting of COVID-19 Restrictions in China
Source: Research Square preprint supplement (doi:10.21203/rs.3.rs-7328288/v1), 2025-10-10
Supplement: Supplementary file 1 [file 2114011480c883bdc0cff290.docx]

**Supplementary material**

Variables in the study

GDM was diagnosed based on the criteria established by the International Association of Diabetes and Pregnancy Study Groups (IADPSG). A diagnosis was confirmed if any of the measurements from a 75g oral glucose tolerance test (OGTT) conducted between 24 and 28 weeks of gestation met or exceeded the following threshold values: fasting glucose ≥ 5.1 mmol/L, 1-hour post-load glucose ≥10.0 mmol/L, and 2-hour post-load glucose ≥ 8.5 mmol/L. Gestational age was ascertained using an algorithm that integrated the date of embryo transfer, early ultrasound estimation, and obstetric history. Preterm birth was defined as delivery occurring between 28 and 37 completed weeks of gestation. Neonatal birth weight of less than 2500 grams was classified as low birth weight. Birth asphyxia was characterized by the inability to initiate and sustain breathing at birth. Pregnancy comorbidities included diabetes, hypertension, cardiovascular disease, chronic pulmonary disease, chronic liver disease, and chronic kidney disease. Neonatal hypoglycemia defined as plasma glucose levels < 2.2 mmol/L.
